# Supplementary material for: Exploring the Production of Secondary Metabolites from a Halophyte Tetragonia tetragonoides through Callus Culture
Source: MDPI journal article supplement (doi:10.3390/horticulturae10030244), 2024-03-03
Supplement: s1 [file s1]

<Supplementary data>

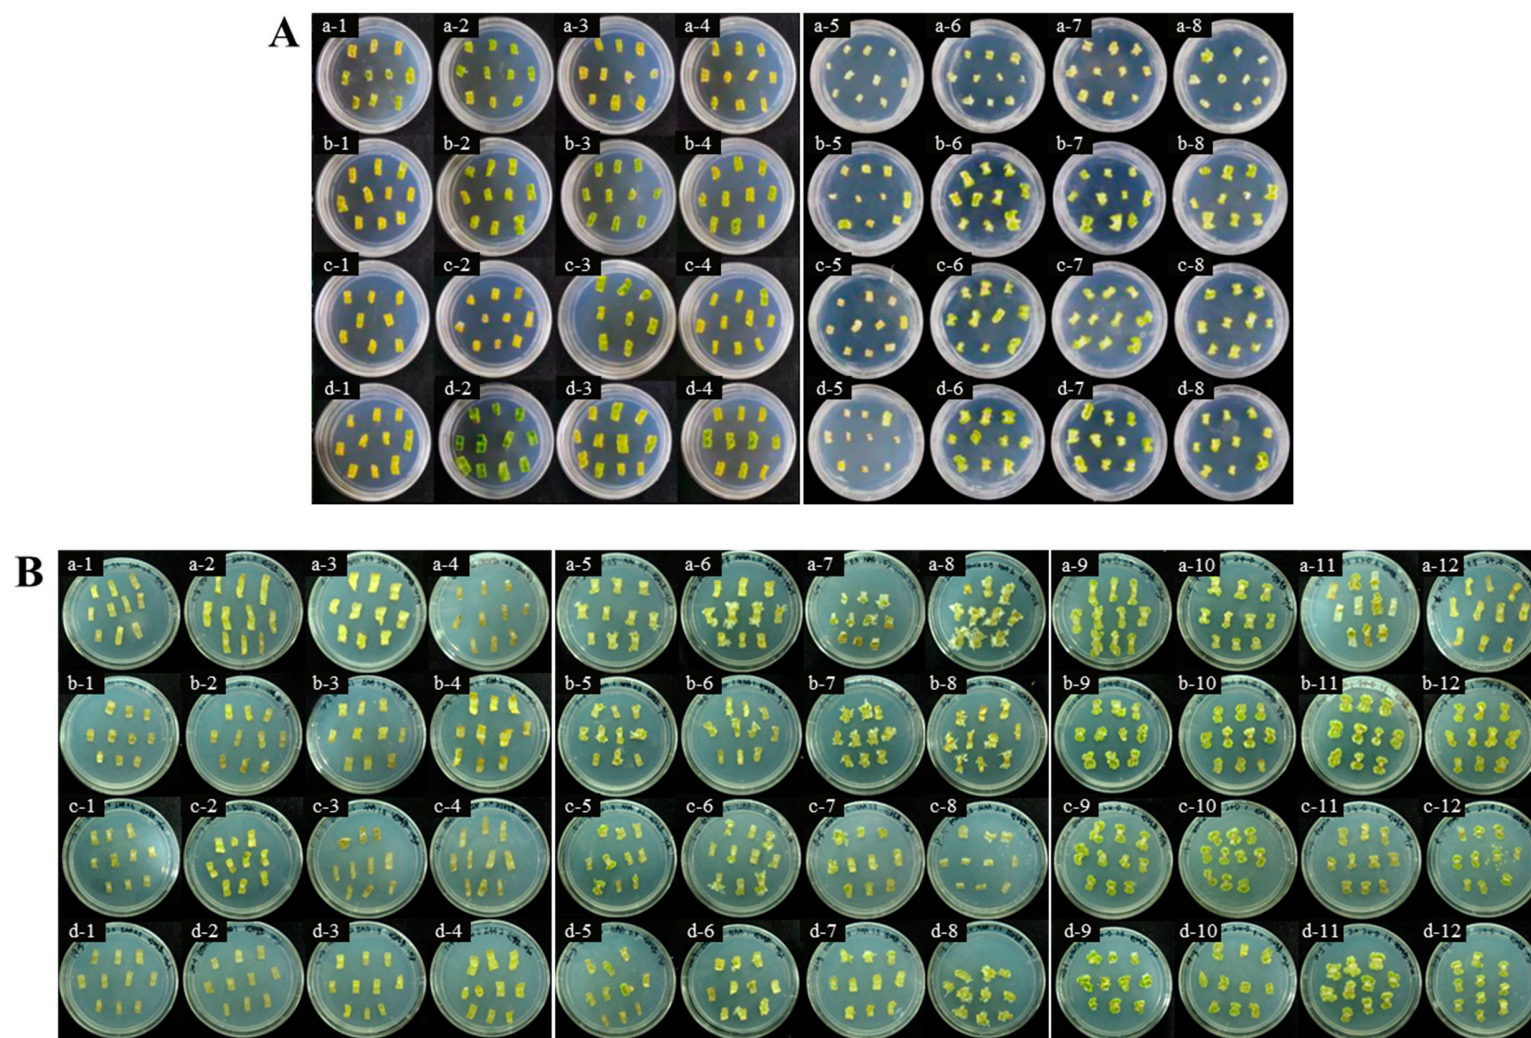

Figure S1. Appearance of callus induced from NZS leaves after four weeks in the medium. (A) Effect of 6-BA and auxins (NAA, 2,4-D) on callus induction from explants. a-d: concentration of 0, 1.0, 1.5, 2.0 mg·L<sup>-1</sup> 6-BA. Numbers 1-4: concentration of 0, 1.0, 1.5, 2.0 mg·L<sup>-1</sup> NAA. Numbers 5-8: concentration of 0, 1.0, 1.5, 2.0 mg·L<sup>-1</sup> 2,4-D. (B) Effect of zeatin and auxins (IAA, NAA, 2,4-D) on callus induction from explants. a-d: concentration of 0.5, 1.0, 1.5, 2.0 mg·L<sup>-1</sup> zeatin. Numbers 1-4: concentration of 0.5, 1.0, 1.5, 2.0 mg·L<sup>-1</sup> IAA. Numbers 5-8: concentration of 0.5, 1.0, 1.5, 2.0 mg·L<sup>-1</sup> NAA. Numbers 9-12: concentration of 0.5, 1.0, 1.5, 2.0 mg·L<sup>-1</sup> 2,4-D.

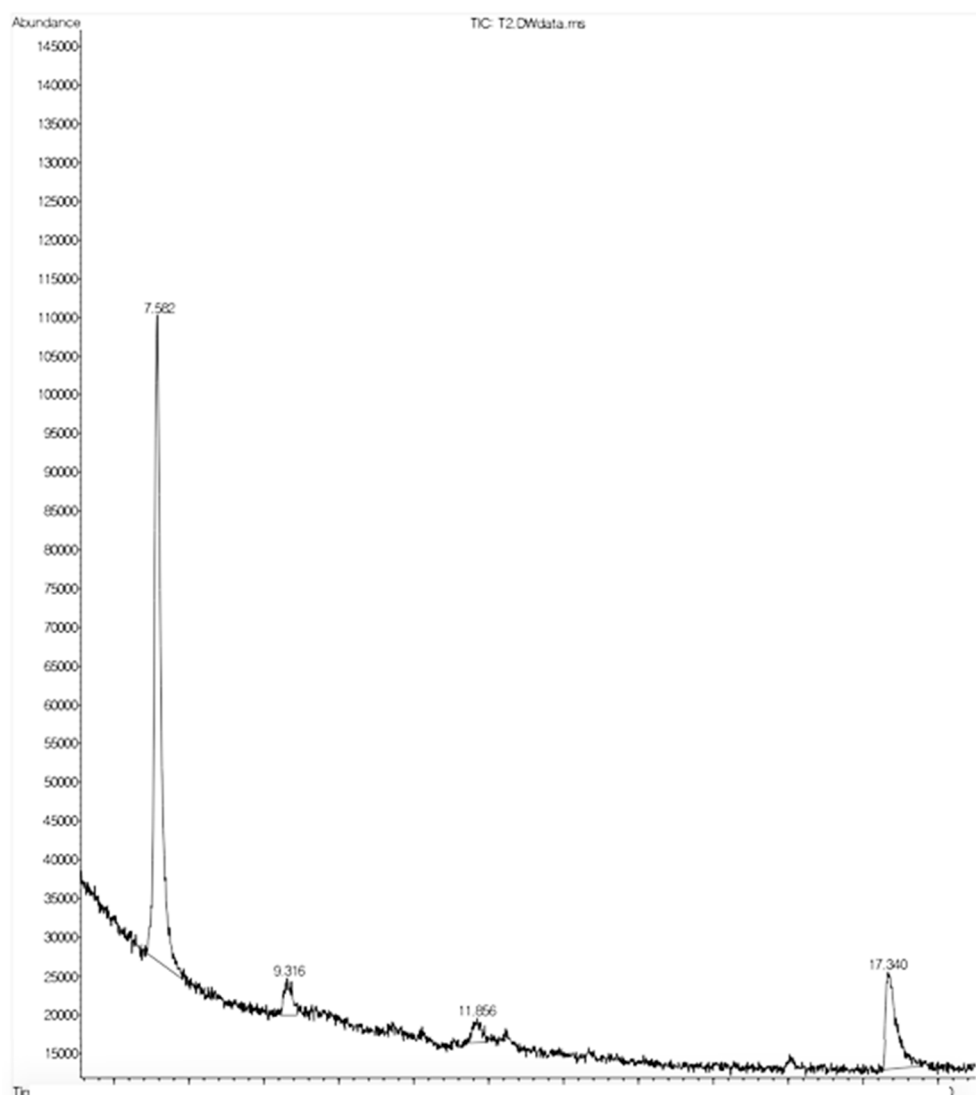

Figure S2. Phytochemicals profile of TGC extracts by gas chromatography-mass spectrometry.

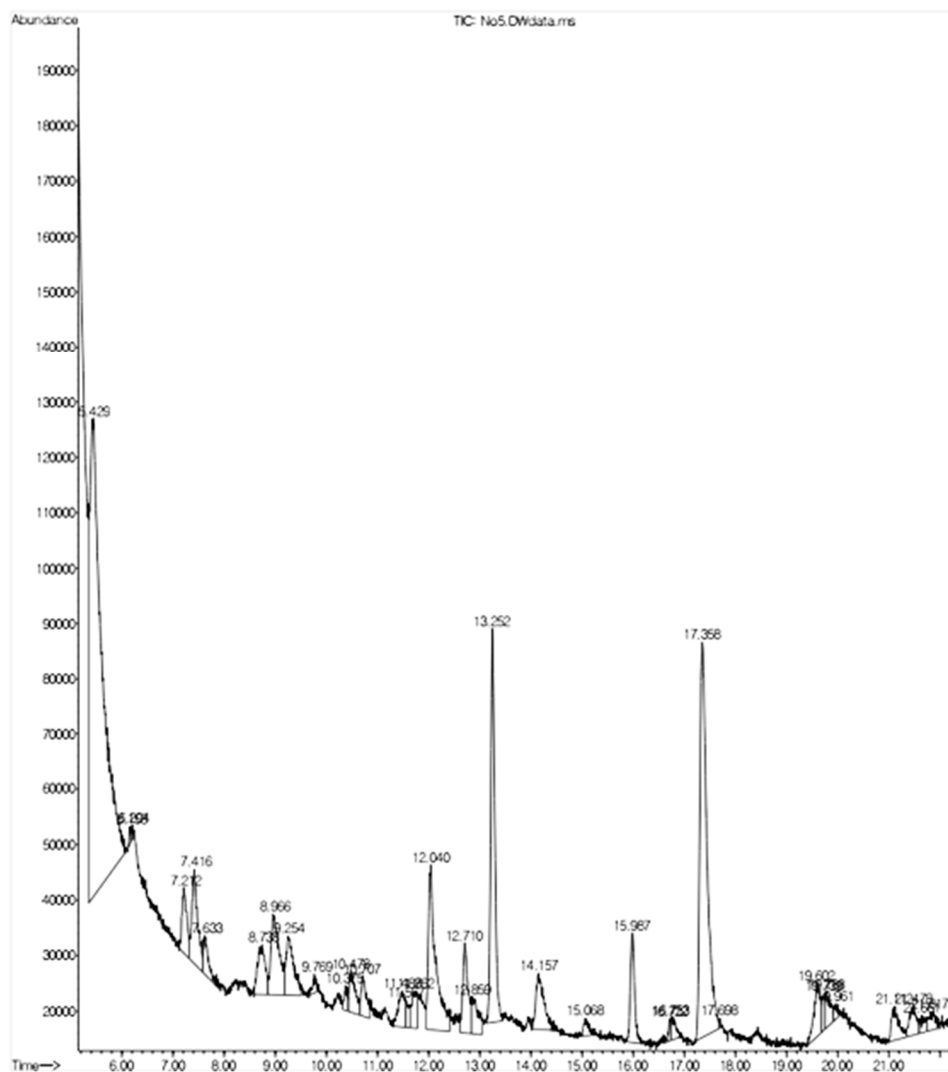

Figure S3. Phytochemicals profile of TNYC extracts by gas chromatography-mass spectrometry.

Table S1. The primers used in this study.

| Gene name   | Amplicon size | Sequence                | Length | GC (%) | Tm |
|-------------|---------------|-------------------------|--------|--------|----|
| <i>CHS</i>  | 200           | ACCGCAAACCCGAAAAATGAG   | 21     | 48     | 59 |
|             |               | GATGGGGCATCGTAATCGCA    | 20     | 55     | 60 |
| <i>CHI</i>  | 203           | GAGGTGTTCAAGGATGAGATGTT | 23     | 43     | 61 |
|             |               | CTCTGCTTTGCTTCAGGGGAA   | 21     | 52     | 61 |
| <i>F3H</i>  | 549           | GGCCCGAAAAGCCCAAAGAAT   | 21     | 52     | 61 |
|             |               | TTGCTGCTGTGCCACTTACAC   | 21     | 52     | 61 |
| <i>FLS</i>  | 391           | CATTAGGGCTGGGGCTTGAA    | 20     | 55     | 60 |
|             |               | AGCTTAGGATTTGGCCCGAC    | 20     | 55     | 60 |
| <i>F3'H</i> | 246           | GGGGTGTTCAATCTTGGGGA    | 21     | 52     | 62 |
|             |               | TGCCTTCACCCCTATCCTCT    | 21     | 52     | 62 |
| <i>DFR</i>  | 296           | TTCTCAACGACGGCTACACT    | 20     | 50     | 59 |
|             |               | AGTCTCCTCACAGTCTTCGC    | 20     | 55     | 59 |

*CHS* : chalcone synthase, *CHI* : chalcone isomerase, *F3H* : flavanone 3-hydroxylase, *F3'H* : flavonoid 3'-hydroxylase, *FLS* : flavonol synthase, *DFR* : dihydroflavonol 4-reductase.
